# Supplementary material for: Potential of Staphylea holocarpa Wood for Renewable Bioenergy
Source: MDPI journal article supplement (doi:10.3390/molecules28010299), 2022-12-30
Supplement: s1 [file s1]

**This file includes:**

**Table S1-S5**

**Tables**

**Table S1** GC-MS analysis of ethanol sample.

| No. | Retention Time<br>(min) | Peak Area<br>(%) | Component                                                                   |
|-----|-------------------------|------------------|-----------------------------------------------------------------------------|
| 1   | 5.30                    | 4.99             | Furfural                                                                    |
| 2   | 5.92                    | 1.95             | Dihydroxyacetone                                                            |
| 3   | 8.79                    | 5.29             | D-Alanine, N-propargyloxycarbonyl-, isohexyl ester                          |
| 4   | 9.91                    | 6.09             | 4H-Pyran-4-one, 2,3-dihydro-3,5-dihydroxy-6-methyl-                         |
| 5   | 11.30                   | 24.66            | 5-Hydroxymethylfurfural                                                     |
| 6   | 12.09                   | 5.47             | Butyl 2-acetoxyacetate                                                      |
| 7   | 12.27                   | 2.14             | 4H-Pyran-4-one, 2,3-dihydro-3,5-dihydroxy-6-methyl-                         |
| 8   | 13.88                   | 2.36             | 4-Nonanol                                                                   |
| 9   | 15.64                   | 4.91             | Sucrose                                                                     |
| 10  | 24.08                   | 5.84             | Acetic acid, 4,4-dimethylcyclopent-1-en-3-one-1-yl,<br>(-)-menthyl esterTER |
| 11  | 28.41                   | 1.52             | Cyclotetrasiloxane, octamethyl-                                             |
| 12  | 29.48                   | 20.75            | dl-.alpha.-Tocopherol                                                       |
| 13  | 32.48                   | 2.91             | Cyclotetrasiloxane, octamethyl-                                             |
| 14  | 33.59                   | 8.33             | Cyclotrisiloxane, hexamethyl-                                               |
| 15  | 33.83                   | 2.79             | Cyclotrisiloxane, hexamethyl-                                               |

**Table S2** GC-MS analysis of the methanol sample.

| No. | Retention Time<br>(min) | Peak Area<br>(%) | Component                                           |
|-----|-------------------------|------------------|-----------------------------------------------------|
| 1   | 5.43                    | 1.37             | 2-Furanmethanol                                     |
| 2   | 5.58                    | 0.98             | 3-Furanmethanol                                     |
| 3   | 5.73                    | 1.77             | Propanoic acid, 3-nitro-, methyl ester              |
| 4   | 5.95                    | 8.88             | Dihydroxyacetone                                    |
| 5   | 7.11                    | 1.83             | 4H-Pyran-4-one, 2,3-dihydro-3,5-dihydroxy-6-methyl- |
| 6   | 8.24                    | 1.07             | DL-Arabinose                                        |
| 7   | 8.59                    | 0.46             | Butanedioic acid, methylene-                        |
| 8   | 8.88                    | 9.36             | D-Alanine, N-propargyloxycarbonyl-, isohexyl ester  |
| 9   | 9.79                    | 0.51             | l-Alanine, N-methoxycarbonyl-, butyl ester          |
| 10  | 9.96                    | 7.88             | 4H-Pyran-4-one, 2,3-dihydro-3,5-dihydroxy-6-methyl- |
| 11  | 10.16                   | 4.40             | L-Sorbose                                           |
| 12  | 10.65                   | 0.56             | Isosorbide Dinitrate                                |
| 13  | 11.14                   | 1.01             | 2-Deoxy-D-galactose                                 |

|    |       |       |                                                        |
|----|-------|-------|--------------------------------------------------------|
| 14 | 11.36 | 20.26 | 5-Hydroxymethylfurfural                                |
| 15 | 11.63 | 6.55  | 1,2,3-Propanetriol, 1-acetate                          |
| 16 | 12.23 | 2.84  | D-Galactose                                            |
| 17 | 12.39 | 1.13  | Lactose                                                |
| 18 | 12.79 | 1.39  | Ethanone, 1-(2-hydroxy-5-methylphenyl)-                |
| 19 | 12.88 | 1.34  | Pentandioic acid, (p-t-butylphenyl) ester              |
| 20 | 14.14 | 0.56  | 2-Formyl-4-methylpentanoic acid, ethyl ester           |
| 21 | 15.80 | 2.04  | D-Allose                                               |
| 22 | 16.72 | 0.64  | 1-Cyclopentene, 3-methylene-1-trimethylsilyloxy-       |
| 23 | 17.99 | 1.06  | 3-Deoxy-d-mannonic lactone                             |
| 24 | 18.68 | 0.61  | d-Gulopyranose                                         |
| 25 | 19.15 | 0.50  | Benzeneacetic acid, 4-hydroxy-3-methoxy-, methyl ester |
| 26 | 19.27 | 1.93  | 4-Hydroxy-2-methoxycinnamaldehyde                      |
| 27 | 21.91 | 1.34  | n-Hexadecanoic acid                                    |
| 28 | 22.46 | 0.67  | 3,5-Dimethoxy-4-hydroxycinnamaldehyde                  |
| 29 | 24.10 | 3.12  | Linoelaidic acid                                       |
| 30 | 24.19 | 1.68  | (R)-(-)-14-Methyl-8-hexadecyn-1-ol                     |
| 31 | 29.45 | 0.85  | Cyclotrisiloxane, hexamethyl-                          |
| 32 | 30.04 | 4.95  | Cyclotetrasiloxane, octamethyl-                        |
| 33 | 30.92 | 0.26  | Cyclotetrasiloxane, octamethyl-                        |
| 34 | 31.49 | 0.49  | Cyclotetrasiloxane, octamethyl-                        |
| 35 | 32.87 | 0.61  | Cyclotetrasiloxane, octamethyl-                        |
| 36 | 33.36 | 1.32  | Cyclotetrasiloxane, octamethyl-                        |
| 37 | 33.61 | 3.80  | Cyclotetrasiloxane, octamethyl-                        |

**Table S3** GC-MS analysis of benzene/ethanol sample

| No. | Retention Time<br>(min) | Peak Area<br>(%) | Component                                           |
|-----|-------------------------|------------------|-----------------------------------------------------|
| 1   | 5.18                    | 0.51             | Glyceraldehyde                                      |
| 2   | 5.99                    | 1.30             | Dihydroxyacetone                                    |
| 3   | 7.88                    | 47.63            | 1-Hexanol, 2-ethyl-                                 |
| 4   | 8.82                    | 2.82             | D-Alanine, N-propargyloxycarbonyl-, isohexyl ester  |
| 5   | 9.93                    | 3.68             | 4H-Pyran-4-one, 2,3-dihydro-3,5-dihydroxy-6-methyl- |
| 6   | 11.32                   | 7.60             | 5-Hydroxymethylfurfural                             |
| 7   | 11.56                   | 0.73             | 1,2,3-Propanetriol, 1-acetate                       |
| 8   | 12.14                   | 4.10             | Butyl 2-acetoxyacetate                              |
| 9   | 12.33                   | 1.45             | 4H-Pyran-4-one, 2,3-dihydro-3,5-dihydroxy-6-methyl- |
| 10  | 13.94                   | 1.03             | Acetoxyacetic acid, nonyl ester                     |
| 11  | 19.29                   | 3.94             | 4-((1E)-3-Hydroxy-1-propenyl)-2-methoxyphenol       |
| 12  | 20.97                   | 0.56             | 2-Propenoic acid, 3-(4-hydroxy-3-methoxyphenyl)-    |

|    |       |      |                                            |
|----|-------|------|--------------------------------------------|
| 13 | 21.94 | 1.24 | n-Hexadecanoic acid                        |
| 14 | 22.12 | 4.72 | Dibutyl phthalate                          |
| 15 | 22.30 | 0.51 | 1-Hexyl-1-nitrocyclohexane                 |
| 16 | 24.11 | 3.11 | Linoelaidic acid                           |
| 17 | 24.20 | 1.73 | Methoxyacetic acid, dodec-9-ynyl ester     |
| 18 | 27.17 | 0.99 | Ethanol                                    |
| 19 | 27.83 | 0.83 | Ethanol                                    |
| 20 | 28.47 | 0.69 | Ethanol                                    |
| 21 | 29.09 | 0.70 | Ethanol                                    |
| 22 | 29.34 | 2.46 | Phthalic acid, di(6-methylhept-2-yl) ester |
| 23 | 29.70 | 0.65 | Ethanol                                    |
| 24 | 32.31 | 1.08 | Cyclotetrasiloxane, octamethyl-            |
| 25 | 32.52 | 1.12 | Cyclotetrasiloxane, octamethyl-            |
| 26 | 32.88 | 2.17 | Cyclotetrasiloxane, octamethyl-            |
| 27 | 33.38 | 2.65 | Cyclotetrasiloxane, octamethyl-            |

**Table S4** GC-MS analysis of the ethanol/methanol sample.

| No. | Retention Time<br>(min) | Peak Area<br>(%) | Component                                           |
|-----|-------------------------|------------------|-----------------------------------------------------|
| 1   | 5.37                    | 3.82             | Furfural                                            |
| 2   | 5.59                    | 1.48             | 2-Furanmethanol                                     |
| 3   | 5.75                    | 0.67             | l-Alanine, N-methoxycarbonyl-, butyl ester          |
| 4   | 5.98                    | 1.73             | Dihydroxyacetone                                    |
| 5   | 7.12                    | 0.40             | 4H-Pyran-4-one, 2,3-dihydro-3,5-dihydroxy-6-methyl- |
| 6   | 8.27                    | 0.55             | Tetrahydro-4H-pyran-4-ol                            |
| 7   | 8.93                    | 3.38             | D-Alanine, N-propargyloxycarbonyl-, isohexyl ester  |
| 8   | 10.01                   | 3.96             | 4H-Pyran-4-one, 2,3-dihydro-3,5-dihydroxy-6-methyl- |
| 9   | 10.54                   | 0.63             | 2-Butanone, 4-hydroxy-3-methyl-                     |
| 10  | 11.67                   | 30.93            | 5-Hydroxymethylfurfural                             |
| 11  | 11.83                   | 1.83             | 5-Hydroxymethylfurfural                             |
| 12  | 12.39                   | 1.00             | Acetoxyacetic acid, nonyl ester                     |
| 13  | 12.82                   | 3.04             | Ethanone, 1-(2-hydroxy-5-methylphenyl)-             |
| 14  | 13.04                   | 1.16             | 1,6:3,4-Dianhydro-2-O-acetyl-.beta.-d-talopyranose  |
| 15  | 14.18                   | 0.89             | 1,4-Dioxane, 2-ethyl-5-methyl-                      |
| 16  | 14.26                   | 0.38             | 4-Nonanol                                           |
| 17  | 14.83                   | 0.39             | di-n-Propylmalonic acid                             |
| 18  | 15.00                   | 0.61             | Phenol, 2-methoxy-4-(1-propenyl)-, (Z)-             |
| 19  | 15.73                   | 0.73             | .alpha.-D-Glucose                                   |
| 20  | 16.17                   | 2.38             | .beta.-D-Glucopyranose, 1,6-anhydro-                |
| 21  | 16.33                   | 0.97             | .beta.-D-Glucopyranose, 1,6-anhydro-                |

|    |       |      |                                                                                        |
|----|-------|------|----------------------------------------------------------------------------------------|
| 22 | 17.90 | 0.69 | 1,6-Anhydro-.beta.-D-glucofuranose                                                     |
| 23 | 18.06 | 0.39 | Homovanillic acid                                                                      |
| 24 | 18.72 | 0.45 | 2-Butanone, 4-(4-hydroxy-3-methoxyphenyl)-                                             |
| 25 | 19.23 | 0.40 | 2-Propanone,<br>1-hydroxy-3-(4-hydroxy-3-methoxyphenyl)-                               |
| 26 | 19.32 | 1.43 | 4-Hydroxy-2-methoxycinnamaldehyde                                                      |
| 27 | 20.66 | 0.37 | 11-Bromo-1-undecanol, TMS derivative                                                   |
| 28 | 21.16 | 2.14 | 2-Propenoic acid, 3-(4-hydroxy-3-methoxyphenyl)-                                       |
| 29 | 22.00 | 2.23 | n-Hexadecanoic acid                                                                    |
| 30 | 22.13 | 0.48 | Dibutyl phthalate                                                                      |
| 31 | 22.58 | 2.98 | 10.alpha.-Eremophilane                                                                 |
| 32 | 24.18 | 3.86 | Linoelaidic acid                                                                       |
| 33 | 24.25 | 0.56 | Chloroacetic acid, dodec-9-ynyl ester                                                  |
| 34 | 24.30 | 0.53 | Chloroacetic acid, dodec-9-ynyl ester                                                  |
| 35 | 29.33 | 0.69 | 2(3H)-Furanone,<br>dihydro-3,4-bis[(4-hydroxy-3-methoxyphenyl)methyl]-,<br>(3R-trans)- |
| 36 | 29.61 | 0.51 | .alpha.-Tocopheryl acetate                                                             |
| 37 | 30.16 | 0.52 | 1,4-Bis(trimethylsilyl)benzene                                                         |
| 38 | 30.85 | 4.68 | 1,4-Bis(trimethylsilyl)benzene                                                         |
| 39 | 31.03 | 1.56 | Benzimidazole, 2-benzylsulfonyl-                                                       |
| 40 | 31.32 | 3.40 | 1,4-Bis(trimethylsilyl)benzene                                                         |
| 41 | 31.95 | 4.21 | Arsenous acid, tris(trimethylsilyl) ester                                              |
| 42 | 32.46 | 5.64 | Arsenous acid, tris(trimethylsilyl) ester                                              |
| 43 | 32.90 | 0.69 | 1,2-Bis(trimethylsilyl)benzene                                                         |
| 44 | 33.54 | 0.64 | Cyclotetrasiloxane, octamethyl-                                                        |

**Table S5** Py-GC-MS analysis of *S. holocarpa* wood.

| No. | Retention Time<br>(min) | Peak Area<br>(%) | Component              |
|-----|-------------------------|------------------|------------------------|
| 1   | 3.70                    | 0.020            | Cyclobutanol           |
| 2   | 4.10                    | 5.769            | Ethyne, fluoro-        |
| 3   | 4.26                    | 2.785            | Acetaldehyde           |
| 4   | 4.67                    | 1.463            | Methyl glyoxal         |
| 5   | 4.94                    | 0.722            | Formic acid            |
| 6   | 5.15                    | 0.012            | Formic acid            |
| 7   | 5.24                    | 0.352            | Acetaldehyde, hydroxy- |
| 8   | 5.38                    | 1.431            | Acetaldehyde, hydroxy- |
| 9   | 5.48                    | 0.906            | 2,3-Butanedione        |
| 10  | 5.62                    | 0.230            | Acetic acid, hydroxy-  |

|    |       |       |                                                           |
|----|-------|-------|-----------------------------------------------------------|
| 11 | 5.71  | 0.092 | Methyl formate                                            |
| 12 | 5.83  | 0.068 | Hydrazine, ethyl-                                         |
| 13 | 6.64  | 0.215 | 2-Propanone, 1-hydroxy-                                   |
| 14 | 6.75  | 2.523 | 2-Propanone, 1-hydroxy-                                   |
| 15 | 6.86  | 0.157 | 1-Propanol, 2-methyl-                                     |
| 16 | 6.93  | 0.078 | Acetic acid, ethoxy-                                      |
| 17 | 7.00  | 0.132 | Ethyl formate                                             |
| 18 | 7.11  | 0.062 | Methyl formate                                            |
| 19 | 7.23  | 0.107 | 2,3-Pentanedione                                          |
| 20 | 7.43  | 0.081 | Acetic acid, hydroxy-, methyl ester                       |
| 21 | 7.53  | 0.392 | 3-Pentanone                                               |
| 22 | 7.62  | 0.042 | Ethyl formate                                             |
| 23 | 7.69  | 0.044 | Ethyl ether                                               |
| 24 | 7.77  | 0.091 | Ethyl ether                                               |
| 25 | 7.84  | 0.174 | Ethyl ether                                               |
| 26 | 7.93  | 0.148 | 1,2-Ethanediol, monoformate                               |
| 27 | 8.02  | 0.125 | 1,2-Ethanediol                                            |
| 28 | 8.36  | 0.059 | Ethyl formate                                             |
| 29 | 8.40  | 0.020 | Dihydroxyacetone                                          |
| 30 | 8.45  | 0.049 | Glycolaldehyde dimer                                      |
| 31 | 8.63  | 0.332 | 2-Butenal, 2-methyl-                                      |
| 32 | 8.69  | 0.195 | 2-Propenoic acid, 2-hydroxyethyl ester                    |
| 33 | 8.75  | 0.088 | 2,3-Diazabicyclo[2.2.1]-hept-2-ene                        |
| 34 | 9.15  | 1.966 | Acetic acid, methyl ester                                 |
| 35 | 9.29  | 0.489 | Acetic acid, 2-ethylbutyl ester                           |
| 36 | 9.41  | 0.053 | Acetic acid, hydrazide                                    |
| 37 | 9.54  | 1.437 | Succindialdehyde                                          |
| 38 | 9.64  | 0.337 | Propanoic acid, 2-oxo-, methyl ester                      |
| 39 | 9.73  | 1.365 | Propanoic acid, 2-oxo-, methyl ester                      |
| 40 | 9.79  | 0.126 | Oxirane, (butoxymethyl)-                                  |
| 41 | 9.92  | 0.361 | Glycidol                                                  |
| 42 | 10.02 | 0.362 | N'-(Diaminomethylidene)formohydrazide                     |
| 43 | 10.30 | 0.072 | Acetone, ethyl methyl acetal                              |
| 44 | 10.41 | 0.177 | Furfural                                                  |
| 45 | 10.62 | 0.126 | 2-Furanmethanol                                           |
| 46 | 10.98 | 0.080 | 2-Ethylideneamino-propionitrile                           |
| 47 | 11.07 | 1.183 | Furfural                                                  |
| 48 | 11.13 | 0.348 | 2-Cyclopenten-1-one                                       |
| 49 | 11.35 | 0.097 | N-Acrylonitrilaziridine                                   |
| 50 | 11.45 | 0.142 | $\text{CH}_2=\text{C}(\text{CH}_3)\text{CH}_2\text{COOH}$ |

|    |       |       |                                                                             |
|----|-------|-------|-----------------------------------------------------------------------------|
| 51 | 11.72 | 0.077 | 2H-Pyran, 3,4-dihydro-6-methyl-                                             |
| 52 | 11.82 | 0.930 | 1,6:2,3-Dianhydro-4-O-acetyl-.beta.-d-mannopyranose                         |
| 53 | 12.01 | 0.086 | 1-Hydroxy-2-butanone                                                        |
| 54 | 12.14 | 0.398 | 2-Propanone, 1-(acetyloxy)-                                                 |
| 55 | 12.22 | 0.163 | 2(5H)-Furanone, 5-methyl-                                                   |
| 56 | 12.35 | 0.036 | 5H-1,4-Dioxepin, 2,3-dihydro-                                               |
| 57 | 12.51 | 0.037 | 4-Cyclopentene-1,3-dione                                                    |
| 58 | 12.63 | 0.018 | 1-Buten-3-yne, 2-methyl-                                                    |
| 59 | 12.74 | 0.214 | Cyclopent-4-ene-1,3-dione                                                   |
| 60 | 13.37 | 0.232 | 2-Butenoic acid, methyl ester, (E)-                                         |
| 61 | 13.48 | 0.120 | 2-Cyclopenten-1-one, 2-methyl-                                              |
| 62 | 13.61 | 0.122 | Furan, 2-ethyl-5-methyl-                                                    |
| 63 | 13.84 | 1.015 | 2(5H)-Furanone                                                              |
| 64 | 13.96 | 0.140 | Ethanol, 2-methoxy-, carbonate (2:1)                                        |
| 65 | 14.27 | 2.272 | 2-Cyclopenten-1-one, 2-hydroxy-                                             |
| 66 | 14.65 | 0.213 | 2,5-Furandione, 3-methyl-                                                   |
| 67 | 14.84 | 0.068 | Cyclohexane, methyl-                                                        |
| 68 | 15.02 | 0.075 | 7-Oxabicyclo[4.1.0]heptane, 1-methyl-                                       |
| 69 | 15.16 | 0.048 | 4,5-Dihydroxy-6-hydroxymethyl-oxepan-3-one                                  |
| 70 | 15.21 | 0.109 | 4,5-Diethyl-3,6-octandione                                                  |
| 71 | 15.35 | 0.409 | 2-Furancarboxaldehyde, 5-methyl-                                            |
| 72 | 15.48 | 0.195 | 2-Cyclopenten-1-one, 3-methyl-                                              |
| 73 | 15.72 | 0.049 | Furyl hydroxymethyl ketone                                                  |
| 74 | 15.85 | 0.123 | 1H-Imidazole-2-carboxaldehyde, 1-methyl-                                    |
| 75 | 15.91 | 0.270 | Phenol                                                                      |
| 76 | 16.38 | 0.044 | 2,4-Hexadiene, 2,5-dimethyl-                                                |
| 77 | 16.52 | 0.255 | 2H-Pyran-2,6(3H)-dione                                                      |
| 78 | 16.61 | 0.857 | 2-Methyliminoperhydro-1,3-oxazine                                           |
| 79 | 16.77 | 0.091 | 3-Amino-2-oxazolidinone                                                     |
| 80 | 16.83 | 0.119 | 9-Azabicyclo[6.1.0]non-4-en-9-amine, (1.alpha.,4Z,8.alpha.)-                |
| 81 | 17.19 | 0.225 | 1H-Tetrazaborole, 4,5-dihydro-1,4,5-trimethyl-                              |
| 82 | 17.33 | 0.048 | 2-Propenal, 3-(dimethylamino)-                                              |
| 83 | 17.46 | 0.029 | d-Mannitol, 1,4-anhydro-                                                    |
| 84 | 17.65 | 1.049 | 1,2-Cyclopentanedione, 3-methyl-                                            |
| 85 | 17.76 | 0.060 | Ethanol, 2-[(1-methylene-2-propenyl)oxy]-                                   |
| 86 | 17.91 | 0.138 | 2-Cyclopenten-1-one, 2,3-dimethyl-                                          |
| 87 | 18.04 | 0.016 | Benzaldehyde, 2-hydroxy-                                                    |
| 88 | 18.12 | 0.145 | 4-Methyl-5H-furan-2-one                                                     |
| 89 | 18.21 | 0.034 | 1,2,3-Oxadiazolium, 3-(2,2-dimethylbutyl)-5-hydroxy-, hydroxide, inner salt |

|     |       |       |                                              |
|-----|-------|-------|----------------------------------------------|
| 90  | 18.30 | 0.132 | Phenol, 2-methyl-                            |
| 91  | 18.48 | 0.156 | 2-Cyclopenten-1-one, 2-hydroxy-3,4-dimethyl- |
| 92  | 18.59 | 0.156 | 2H-Pyran-2-methanol, tetrahydro-             |
| 93  | 18.74 | 0.730 | Furfuryl alcohol, tetrahydro-5-methyl-, cis- |
| 94  | 18.91 | 0.267 | p-Cresol                                     |
| 95  | 19.06 | 0.131 | 2-Methyl-2-vinylloxirane                     |
| 96  | 19.18 | 0.043 | Valeraldehyde, 2,2-dimethyl-, oxime          |
| 97  | 19.29 | 0.110 | Furyl hydroxymethyl ketone                   |
| 98  | 19.34 | 0.041 | 4-Formyl-1,3(2H)-dihydroimidazole-2-thione   |
| 99  | 19.44 | 1.668 | Phenol, 2-methoxy-                           |
| 100 | 19.56 | 0.062 | Z-(13,14-Epoxy)tetradec-11-en-1-ol acetate   |
| 101 | 19.78 | 1.642 | 2(3H)-Furanone, dihydro-4-hydroxy-           |
| 102 | 19.99 | 0.015 | 2-Acetamido-2,3-dideoxy-d-glucose            |
| 103 | 20.20 | 0.124 | Maltol                                       |
| 104 | 20.30 | 0.175 | 2-Cyclopenten-1-one, 3-ethyl-2-hydroxy-      |
| 105 | 20.48 | 0.509 | 2,4(3H,5H)-Furandione, 3-methyl-             |
| 106 | 20.68 | 0.041 | 2H-Pyran-2-one, 4-hydroxy-6-methyl-          |
| 107 | 20.76 | 0.014 | 6-Hydroxy-2-pyridinecarboxylic acid          |
| 108 | 20.82 | 0.064 | 1,3-Pentadiene                               |
| 109 | 20.89 | 0.084 | Phenol, 2,4-dimethyl-                        |
| 110 | 21.12 | 0.328 | Cyclopentanone, 2-methyl-                    |
| 111 | 21.34 | 0.442 | Oxalic acid, 4-chlorophenyl octyl ester      |
| 112 | 21.47 | 0.298 | 2,3-Dihydroxybenzaldehyde                    |
| 113 | 21.62 | 0.055 | Phenylephrine                                |
| 114 | 21.70 | 0.192 | Creosol                                      |
| 115 | 21.87 | 0.178 | Creosol                                      |
| 116 | 22.03 | 1.648 | Creosol                                      |
| 117 | 22.28 | 1.333 | Catechol                                     |
| 118 | 22.58 | 0.454 | 1,4:3,6-Dianhydro-.alpha.-d-glucopyranose    |
| 119 | 22.71 | 0.131 | 4H-Pyran-4-one, 2,6-dimethyl-                |
| 120 | 22.78 | 0.198 | Tetradecane, 4-methyl-                       |
| 121 | 22.91 | 0.941 | 5-Hydroxymethylfurfural                      |
| 122 | 23.07 | 0.096 | Hexadecanenitrile                            |
| 123 | 23.14 | 0.082 | Oxacyclotridecan-2-one                       |
| 124 | 23.22 | 0.152 | trans-2-Dodecen-1-ol, trifluoroacetate       |
| 125 | 23.39 | 0.215 | E-8-Methyl-9-tetradecen-1-ol acetate         |
| 126 | 23.48 | 0.317 | 1,2-Benzenediol, 3-methyl-                   |
| 127 | 23.59 | 0.789 | 1,2-Benzenediol, 3-methoxy-                  |
| 128 | 23.80 | 0.747 | Phenol, 4-ethyl-2-methoxy-                   |
| 129 | 23.84 | 0.229 | Benzenethiol, o-isopropyl-,                  |

|     |       |       |                                                                                              |
|-----|-------|-------|----------------------------------------------------------------------------------------------|
| 130 | 23.90 | 0.121 | 2,2-Dimethyl-1-aza-spiro[2.4]heptane                                                         |
| 131 | 23.96 | 0.211 | Boranamine, 1,1-diethyl-N-phenyl-                                                            |
| 132 | 24.08 | 0.467 | 1,2-Benzenediol, 4-methyl-                                                                   |
| 133 | 24.16 | 0.160 | 6-Hepten-1-ol, 2-methyl-                                                                     |
| 134 | 24.23 | 0.179 | 2-(2-Methyloxyryl)ethoxycarbonylmethoxyiminomethane                                          |
| 135 | 24.28 | 0.172 | 1,3,5-Benzenetriol                                                                           |
| 136 | 24.36 | 0.273 | Benzaldehyde, 4-hydroxy-                                                                     |
| 137 | 24.48 | 2.747 | 2-Methoxy-4-vinylphenol                                                                      |
| 138 | 24.73 | 0.142 | 5,9-Dimethyl-2-(1-methylethylidene)-1-cyclodecanol                                           |
| 139 | 24.81 | 0.243 | 13-Methyltetradecanal                                                                        |
| 140 | 24.86 | 0.192 | 1,1-Dimethyl-5-trimethylsilyl-1-silacyclohex-3-ene                                           |
| 141 | 24.91 | 0.207 | Methyl 6,8-dodecadienyl ether                                                                |
| 142 | 25.11 | 2.854 | Phenol, 2,6-dimethoxy-                                                                       |
| 143 | 25.20 | 0.826 | Phenol, 2-methoxy-3-(2-propenyl)-                                                            |
| 144 | 25.35 | 0.828 | Phenol, 2-methoxy-4-propyl-                                                                  |
| 145 | 25.45 | 0.277 | Methyl 6,8-dodecadienyl ether                                                                |
| 146 | 25.61 | 0.188 | 2-(1-Methylcyclopropyl)thiophene                                                             |
| 147 | 25.71 | 0.429 | 13-Octadecenal, (Z)-                                                                         |
| 148 | 25.84 | 0.467 | (-)-8-p-Menthen-2-yl, acetate, trans                                                         |
| 149 | 25.96 | 1.063 | Vanillin                                                                                     |
| 150 | 26.01 | 0.940 | Phenol, 2-methoxy-4-(1-propenyl)-                                                            |
| 151 | 26.25 | 0.550 | 7-Oxabicyclo[4.1.0]hept-4-en-3-one, 1,2,2,4,5,6-hexamethyl-                                  |
| 152 | 26.46 | 0.200 | (-)-Spathulenol                                                                              |
| 153 | 26.60 | 1.490 | 3,5-Dimethoxy-4-hydroxytoluene                                                               |
| 154 | 26.68 | 2.183 | trans-Isoeugenol                                                                             |
| 155 | 26.86 | 0.496 | Phenol, 2-methoxy-4-propyl-                                                                  |
| 156 | 26.94 | 0.148 | Ketone, methyl 2-methyl-1-cyclohexen-1-yl, semicarbazone                                     |
| 157 | 27.00 | 0.172 | d-Glucosamine, diethylmercaptal                                                              |
| 158 | 27.09 | 0.534 | Nonanoic acid                                                                                |
| 159 | 27.21 | 0.338 | Benzene, hexamethyl-                                                                         |
| 160 | 27.33 | 0.690 | Apocynin                                                                                     |
| 161 | 27.45 | 0.458 | Benzene, 4-ethyl-1,2-dimethoxy-                                                              |
| 162 | 27.59 | 0.131 | Spiro[4.5]decan-7-one, 1,8-dimethyl-8,9-epoxy-4-isopropyl-                                   |
| 163 | 27.63 | 0.186 | 1H-6-Purinone,6,7-dihydro-2-amino-7-[3,5-dihydroxy-6-(hydroxymethyl)tetrahydro-2H-2-pyranyl] |
| 164 | 27.75 | 0.536 | .beta.-D-Glucopyranose, 1,6-anhydro-                                                         |
| 165 | 27.83 | 0.983 | 5-tert-Butylpyrogallol                                                                       |
| 166 | 28.03 | 2.797 | 2-Propanone, 1-(4-hydroxy-3-methoxyphenyl)-                                                  |
| 167 | 28.13 | 0.817 | D-Allose                                                                                     |
| 168 | 28.20 | 1.000 | .beta.-D-Glucopyranose, 1,6-anhydro-                                                         |



|     |       |       |                                                                |
|-----|-------|-------|----------------------------------------------------------------|
| 169 | 28.39 | 0.603 | Nonadecanoic acid                                              |
| 170 | 28.54 | 2.942 | (E)-Stilbene                                                   |
| 171 | 28.77 | 0.657 | 4-(1-Hydroxyallyl)-2-methoxyphenol                             |
| 172 | 28.91 | 0.320 | 1-(3,4-methylenedioxyphenyl)propane-1-ol                       |
| 173 | 28.97 | 0.181 | Benzoic acid, 4-hydroxy-3-methoxy-, methyl ester               |
| 174 | 29.05 | 0.221 | .beta.-D-Glucopyranoside, methyl 4,6-O-nonylidene-             |
| 175 | 29.15 | 0.716 | Phenol, 2,6-dimethoxy-4-(2-propenyl)-                          |
| 176 | 29.27 | 0.559 | 2-Propanone, 1,1-diphenyl-                                     |
| 177 | 29.68 | 0.164 | Octadecane, 1-bromo-                                           |
| 178 | 29.76 | 0.120 | 5-Isopropenyloxymethylene-3,3-dimethyl-cyclohexanone           |
| 179 | 29.85 | 0.257 | Propenoic acid, 3-(bicyclo[2.2.1]hept-1-yl)-, methyl ester     |
| 180 | 30.10 | 0.841 | (E)-2,6-Dimethoxy-4-(prop-1-en-1-yl)phenol                     |
| 181 | 30.17 | 0.963 | Benzenepropanol, 4-hydroxy-3-methoxy-                          |
| 182 | 30.40 | 0.886 | Benzaldehyde, 4-hydroxy-3,5-dimethoxy-                         |
| 183 | 30.66 | 0.846 | 4-((1E)-3-Hydroxy-1-propenyl)-2-methoxyphenol                  |
| 184 | 30.88 | 0.209 | cis-2-Methyl-4-phenylthiane                                    |
| 185 | 31.04 | 0.174 | 3-(1-Methyl-1-silacyclobutyl)benzoic acid, methyl ester        |
| 186 | 31.19 | 2.050 | (E)-2,6-Dimethoxy-4-(prop-1-en-1-yl)phenol                     |
| 187 | 31.29 | 0.337 | 4-Propyl-1,1'-diphenyl                                         |
| 188 | 31.48 | 0.232 | Estra-1,3,5(10)-trien-17.beta.-ol                              |
| 189 | 31.72 | 0.140 | 4,6,10,10-Tetramethyl-5-oxatricyclo[4.4.0.0(1,4)]dec-2-en-7-ol |
| 190 | 32.04 | 0.461 | Ethanone, 1-(4-hydroxy-3,5-dimethoxyphenyl)-                   |
| 191 | 32.19 | 0.985 | Coniferyl aldehyde                                             |
| 192 | 32.26 | 1.525 | 4-((1E)-3-Hydroxy-1-propenyl)-2-methoxyphenol                  |
| 193 | 32.96 | 0.755 | 1-Butanone, 1-(2,4,6-trihydroxy-3-methylphenyl)-               |
| 194 | 33.29 | 0.106 | 5H-Dibenzo[a,d]cyclohepten-5-ol, 10,11-dihydro-                |
| 195 | 33.39 | 0.035 | Spiro[4.5]decan-7-one, 1,8-dimethyl-8,9-epoxy-4-isopropyl-     |
| 196 | 33.52 | 0.070 | 9-Hexadecenoic acid, methyl ester, (Z)-                        |
| 197 | 33.77 | 0.014 | 2-Dodecen-1-yl(-)succinic anhydride                            |
| 198 | 34.31 | 0.079 | Silane, bromotriethyl-                                         |
| 199 | 34.51 | 0.162 | 4'-Phenylpropiophenone                                         |
| 200 | 34.62 | 0.045 | 4-Isothiazolecarbonitrile, 5-methyl-3-phenyl-                  |
| 201 | 34.75 | 0.057 | 12-Methyl-E,E-2,13-octadecadien-1-ol                           |
| 202 | 35.64 | 0.316 | Docosanoic acid                                                |
| 203 | 35.76 | 0.087 | (2,2-Bis(ethylthio)-1,2,3,4-tetrahydronaphthalen-1-yl)methanol |
| 204 | 36.43 | 0.109 | 9-Undecenal, 2,10-dimethyl-                                    |
| 205 | 36.45 | 0.078 | 9-Undecenal, 2,10-dimethyl-                                    |
| 206 | 36.88 | 0.461 | 5-(3-Hydroxypropyl)-2,3-dimethoxyphenol                        |
| 207 | 37.12 | 0.084 | 5-(Acetylaminomethyl)-4-amino-2-methylpyrimidine               |
| 208 | 37.31 | 0.084 | Guanidine, N-[3-[(2-bromophenyl)amino]-1-propenyl]-            |

|     |       |       |                                             |
|-----|-------|-------|---------------------------------------------|
| 209 | 37.83 | 0.369 | trans-Sinapyl alcohol                       |
| 210 | 37.99 | 0.049 | 1,4-Pentadien-3-one, 1,5-diphenyl-          |
| 211 | 39.16 | 0.498 | n-Hexadecanoic acid                         |
| 212 | 39.42 | 0.076 | Hexadec-2-enylsuccinic anhydride            |
| 213 | 39.67 | 0.090 | Phthalic acid, hex-2-yn-4-yl isohexyl ester |
| 214 | 40.27 | 0.103 | Thioguanine                                 |
